# Supplementary material for: Myostatin-deficiency in mice increases global gene expression at the Dlk1-Dio3 locus in the skeletal muscle
Source: PubMed Central journal article supplement (PMC5351603; doi:10.18632/oncotarget.13966), 2016-12-15
Supplement: oncotarget-08-5943-s001.pdf [file oncotarget-08-5943-s001.pdf]

## Myostatin-deficiency in mice increases global gene expression at the *Dlk1-Dio3* locus in the skeletal muscle

### Supplementary Materials

**Supplementary Table S1: Primer sequences used for PCR**

| Gene name                                      | Sequence                                   |                           |
|------------------------------------------------|--------------------------------------------|---------------------------|
| miR-411                                        | TAGTAGACCGTATAGCGTAC                       |                           |
| miR-434-3p                                     | TTTGAACCATCACTCGACTCC                      |                           |
| miR-193                                        | AACTGGCCTACAAAGTCCCAG                      |                           |
| miR-379                                        | TGGTAGACTATGGAACGTAG                       |                           |
| miR-193b                                       | AACTGGCCCACAAAGTCCCAG                      |                           |
| miR-22                                         | miScript Primer Assay (Qiagen, MS00001330) |                           |
| miR-223                                        | miScript Primer Assay (Qiagen, MS00001960) |                           |
| U6                                             | miScript Primer Assay (Qiagen)             |                           |
| miR-127                                        | TCGGATCCGTCTGAGCTTGG                       |                           |
| miR-300                                        | TATGCAAGGGCAAGCTCTCTT                      |                           |
| miR-329                                        | AACACACCCAGCTAACCTTT                       |                           |
| miR-337                                        | miScript Primer Assay (Qiagen, MS00011844) |                           |
| miR-376a                                       | ATCGTAGAGGAAAATCCACG                       |                           |
| miR-381                                        | TATACAAGGGCAAGCTCTCTG                      |                           |
| miR-434-5p                                     | GCTCGACTCATGGTTTGAAC                       |                           |
| miR-540-3p                                     | AGGTCAGAGGTCGATCCTG                        |                           |
| miR-543-3p                                     | AAACATTCGCGGTGCACTTCT                      |                           |
| miR-486                                        | TCCTGTACTGAGCTGCCCG                        |                           |
|                                                | <b>Forward</b>                             | <b>Reverse</b>            |
| pri-miR-127                                    | CTGGCTTTCTCTTGCATCCT                       | CGGATCCGATGATCTTTCTG      |
| pri-miR-411                                    | ACACGGTCCACTAACCTCA                        | ATCATGGAGAAGCCCTGATG      |
| <i>Dlk1</i>                                    | ACTTGCGTGGACCTGGAGAA                       | CTGTTGGTTGCGGCTACGAT      |
| <i>Gtl2</i>                                    | TTGCACATTTCTGTGGGAC                        | AAGCACCATGAGCCACTAGG      |
| <i>Rian</i>                                    | TCGAGACACAAGAGGACTGC                       | ATTGGAAGTCTGAGCCATGG      |
| <i>Mirg</i>                                    | CCTTCCTGGATCTCTCGCTT                       | GTGGGAGTTGAAACATGGGT      |
| <i>Rtl1</i>                                    | TACTGCTCTTGGTGAGAGTGGACCC                  | GGAGCCACTTCATGCCTAAGACGA  |
| <i>Rtl1as</i>                                  | TCTCCACTCGAGGGTACTCCACCT                   | GTGGAGAACTTCGCTGTCATCGC   |
| <i>IGF2</i>                                    | TCAGCCAAGCATGGCACAG                        | TACCAGGCCAATTCATAGTCTCCAA |
| <i>Rpl26</i>                                   | GGTCTATGCCCATTCGGAAGG                      | TCGTTTCGATGTAGATGACGTA    |
| <i>IG-DMR ncRNA</i>                            | AGAAGCTGTGGTGGGATTGCT                      | AGGGCCACTTCGATCAGAAT      |
| <i>IPW lncRNA</i>                              | TGCCTGAGGAAAAGCGAGTT                       | GTGGTGTCTGCTGCTACACA      |
| <i>Sfrp1</i>                                   | TGGCCCGAGATGCTCAAATG                       | GGTTGTACCTTGGGGCTTAGA     |
| <i>Sfrp2</i>                                   | CGTGGGCTCTTCTCTTCG                         | ATGTTCTGGTACTCGATGCCG     |
| <i>Sfrp4</i>                                   | AGAAGGTCCATACAGTGGGAAG                     | GTTACTGCGACTGGTGCGA       |
| <i>Sfrp5</i>                                   | CACTGCCACAAGTTCCTCC                        | TCTGTTCCATGAGGCCATCAG     |
| <i>Dnmt3a1</i>                                 | GAGGGAACTGAGACCCAC                         | CTGGAAGGTGAGTCTTGCCA      |
| <i>Dnmt3a2</i>                                 | CTCACACCTGAGCTGTACTGCAGAG                  | CTCCACCTTCTGAGACTCTCCAGAG |
| <i>IG-DMR for Bisulfite Sequencing (1st)</i>   | TAAGTGTGTGGTTTGTATGGGTA                    | CCATCCCCTATACTCAAACATTCT  |
| <i>IG-DMR for Bisulfite Sequencing (2nd)</i>   | TGGTTTGTATGGGTAAGTTTATG                    | CTCCCCTCACTCCAAAAATTA     |
| <i>Gtl2-DMR for Bisulfite Sequencing (1st)</i> | TTTTTGTGTAGTTTGGGTG                        | CCATATCTCTCACCATTAATA     |
| <i>Gtl2-DMR for Bisulfite Sequencing (2nd)</i> | GTTATAGTAATTTGTATAGAATTTGGGG               | AAACTTCAACCACCAAAACC      |
